# Supplementary material
Source: PubMed Central journal article supplement (PMC5033661)

# Supplementary Figure 1

A

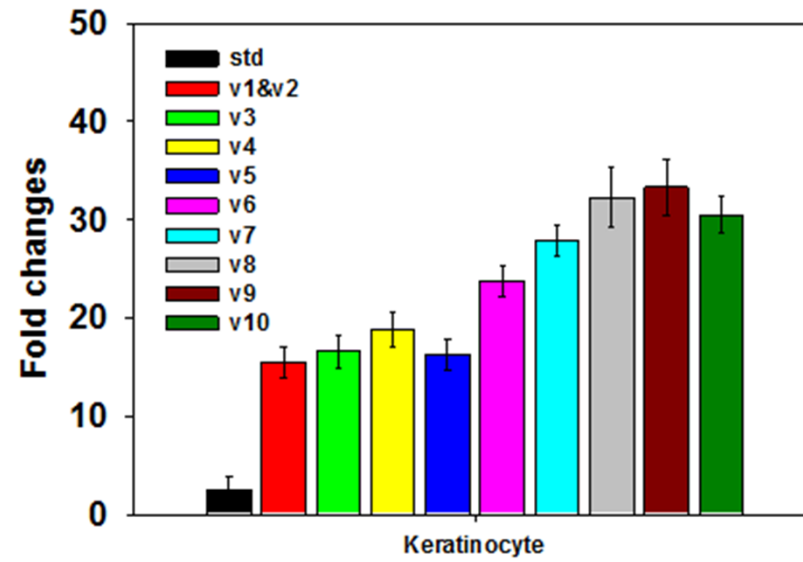

B

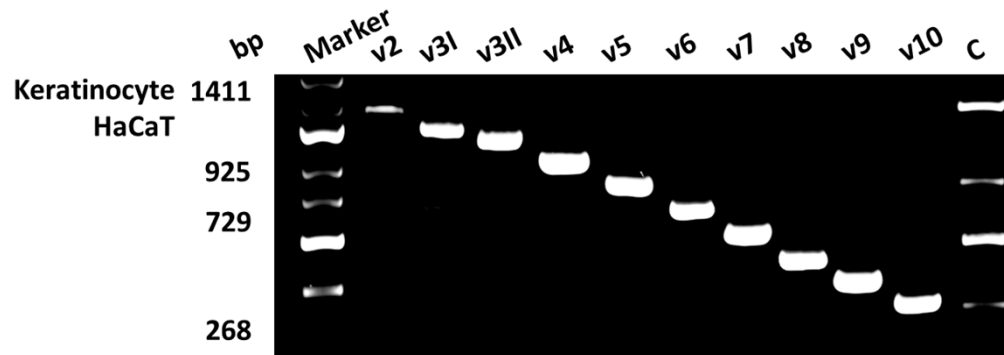

# Supplementary Figure 2

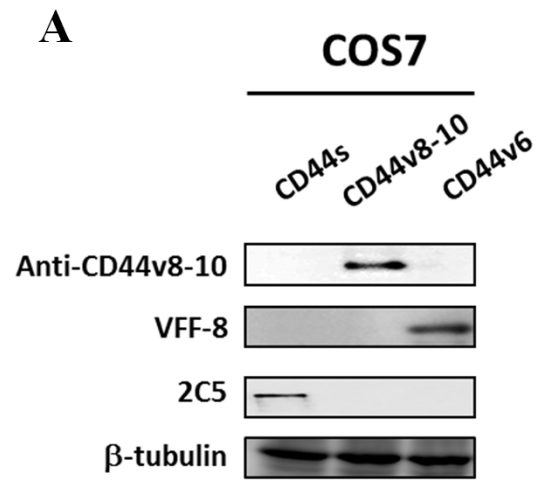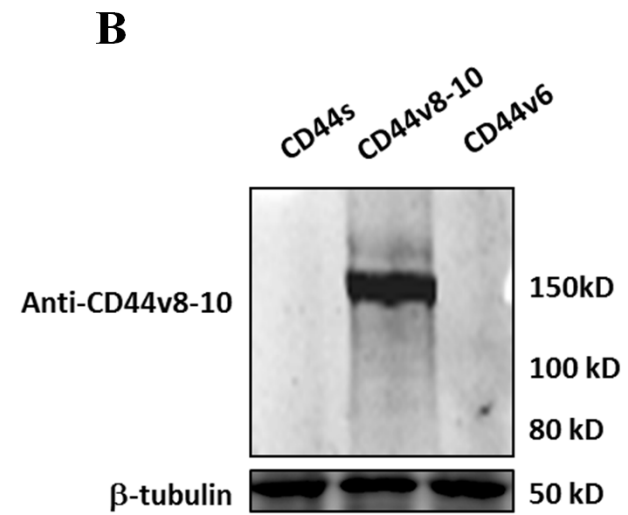

# Supplementary Figure 3

**A**

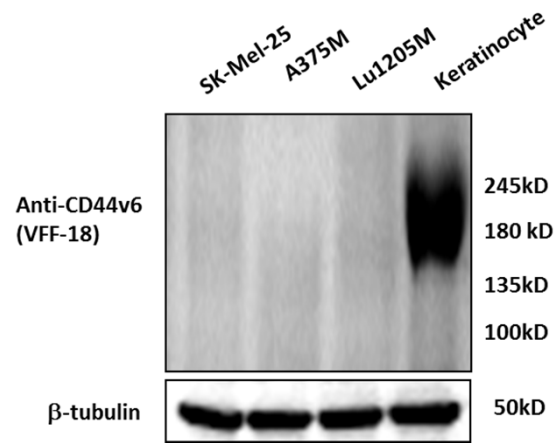

**B**

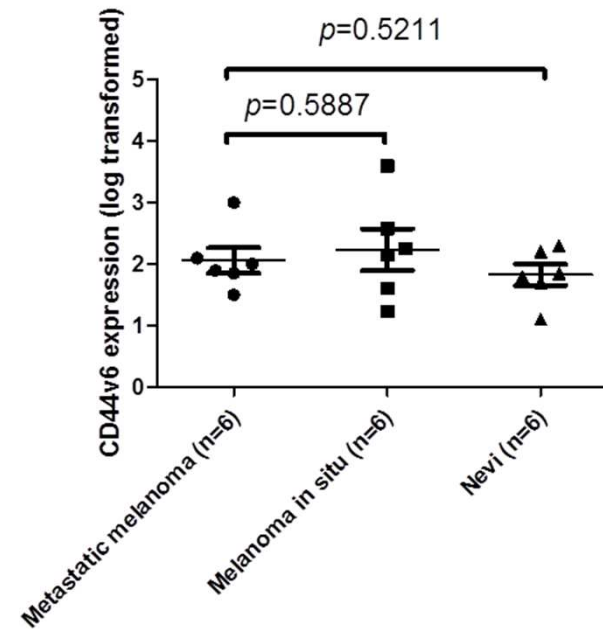

**C**

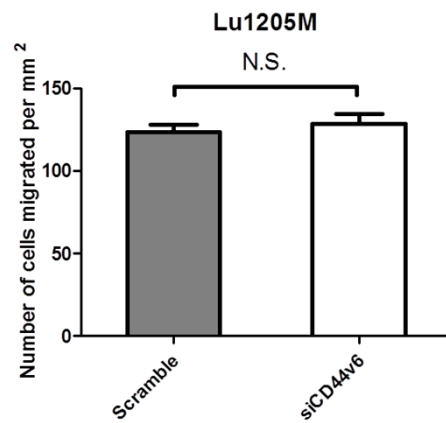

# Supplementary Figure 4

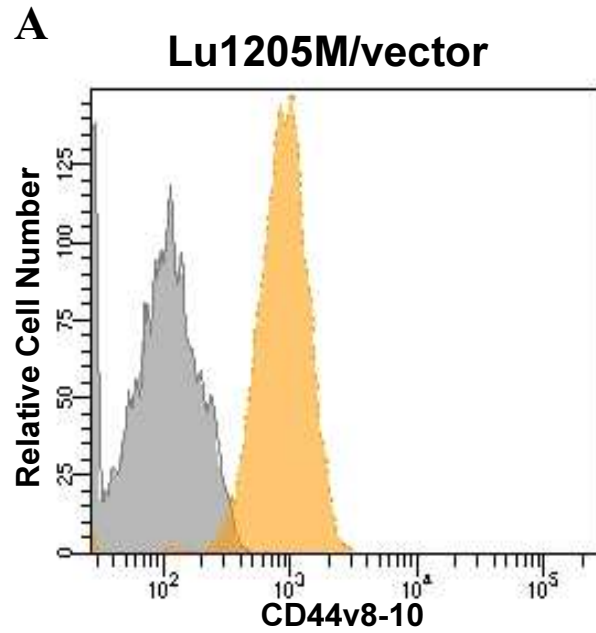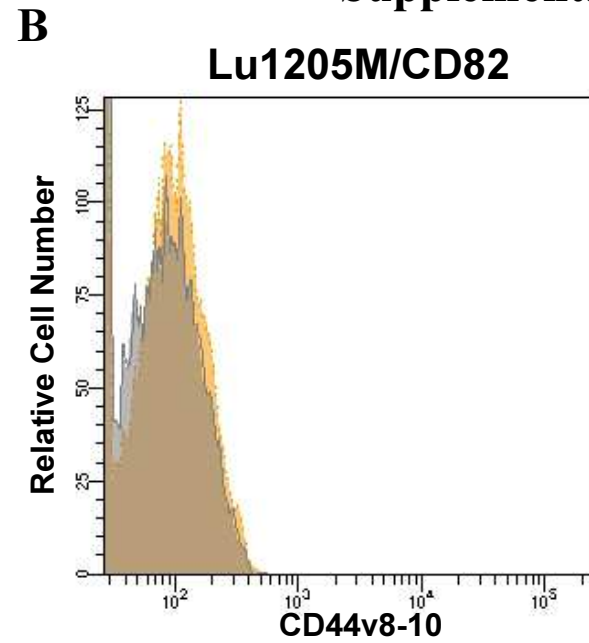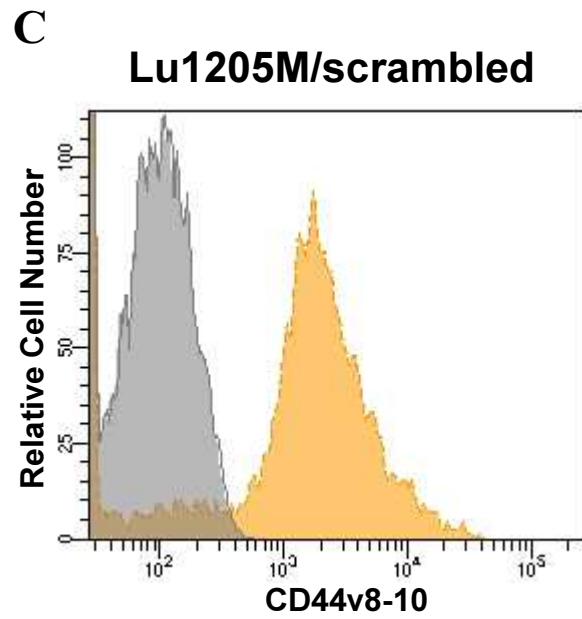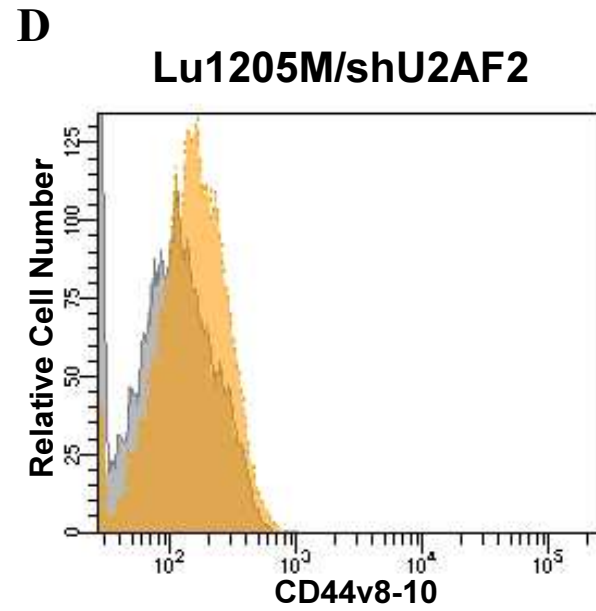

# Supplementary Figure 5

**A**

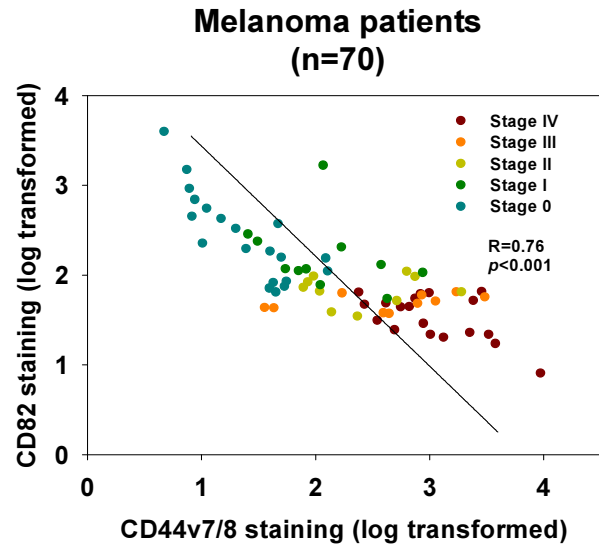

**B**

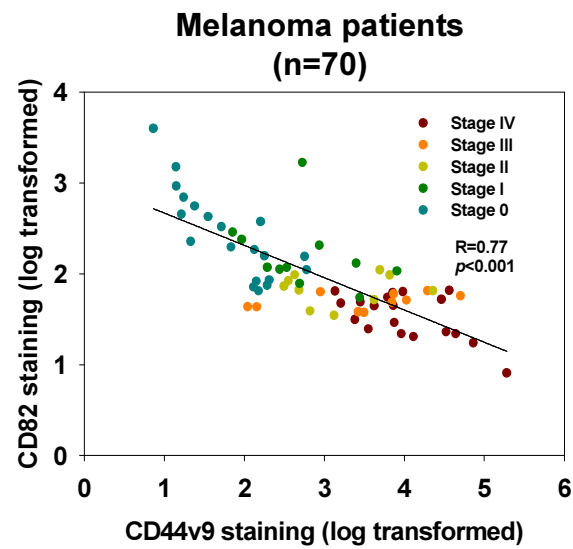

**C**

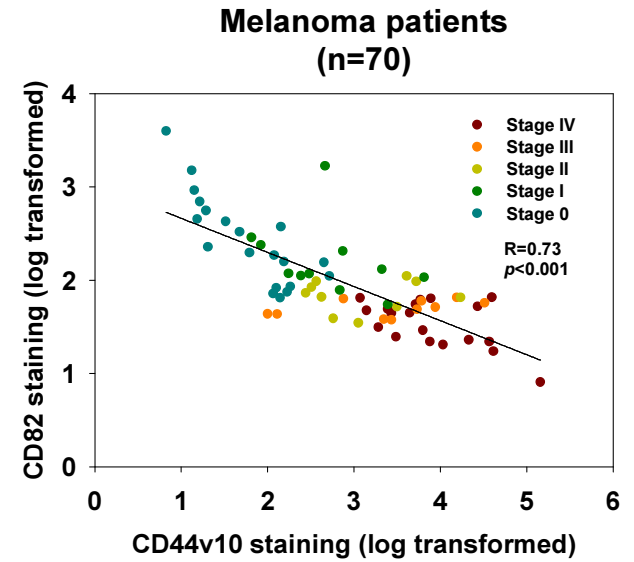

# Supplementary Figure 6

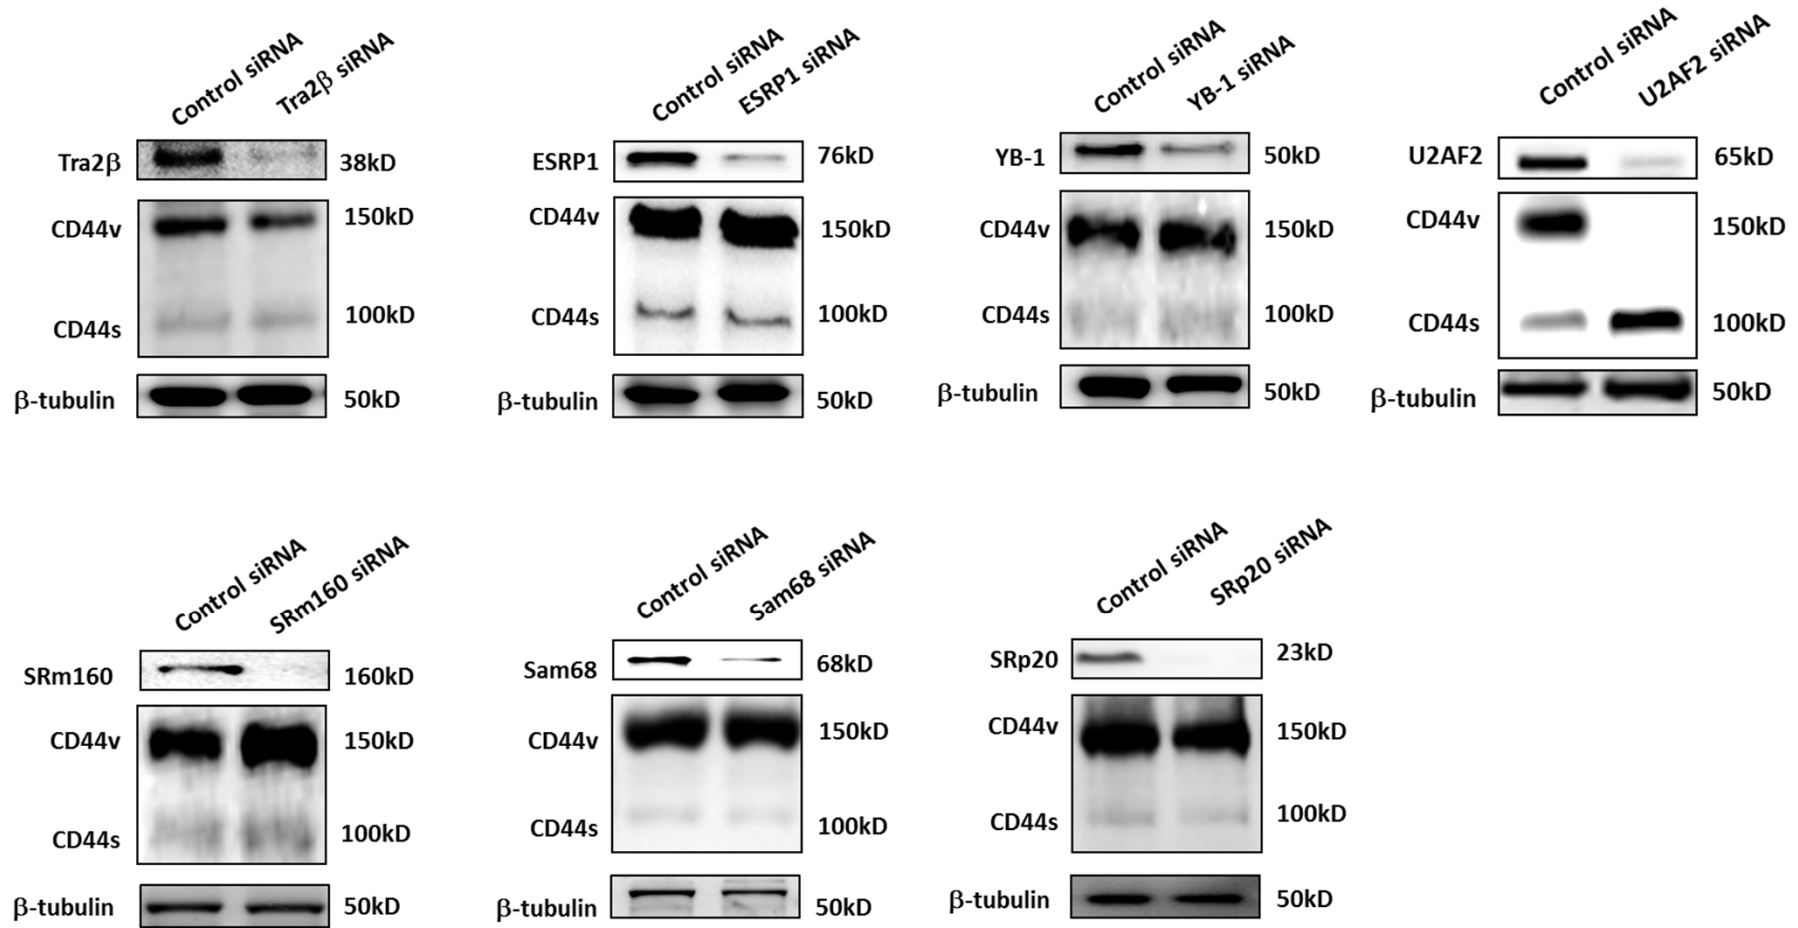

**A**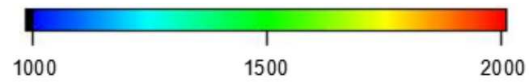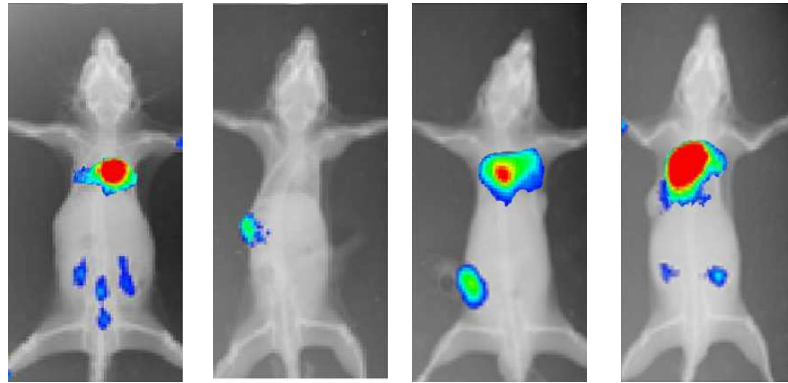

Lung

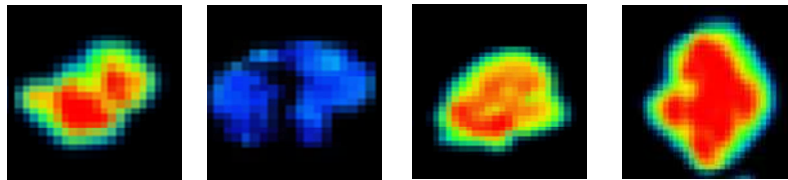

Vector

CD82

CD82+  
U2AF2CD82+  
CD44v8-10**C**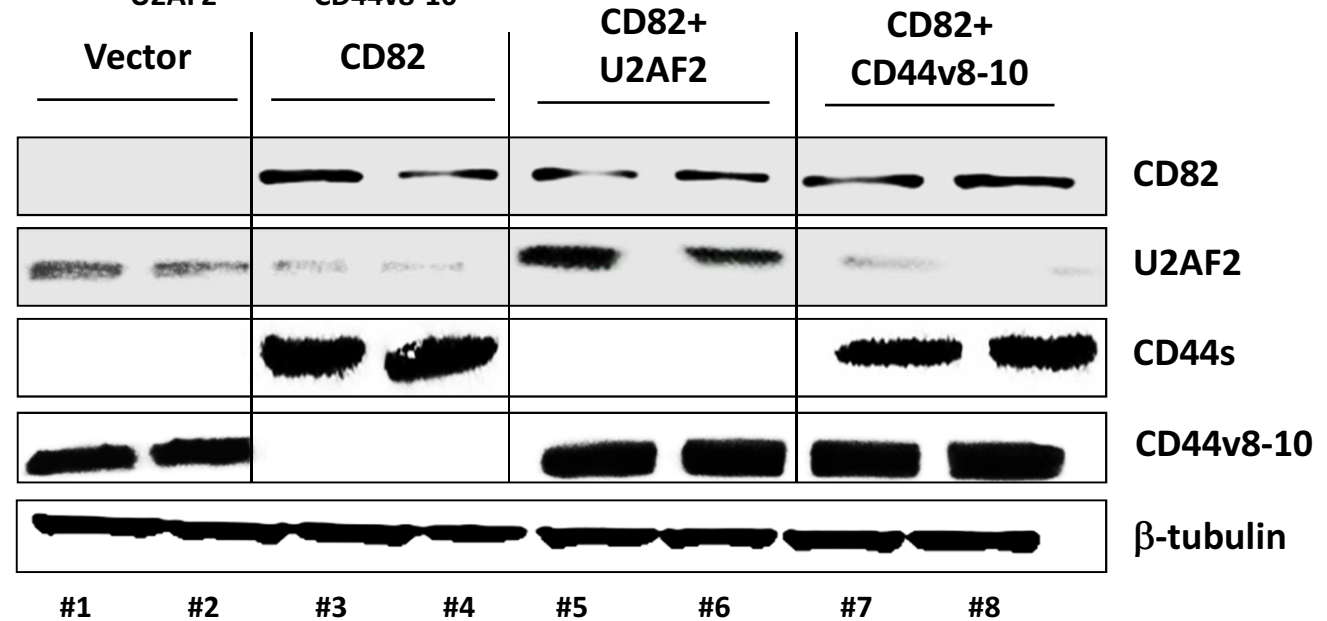**B**

## Supplementary Figure 7

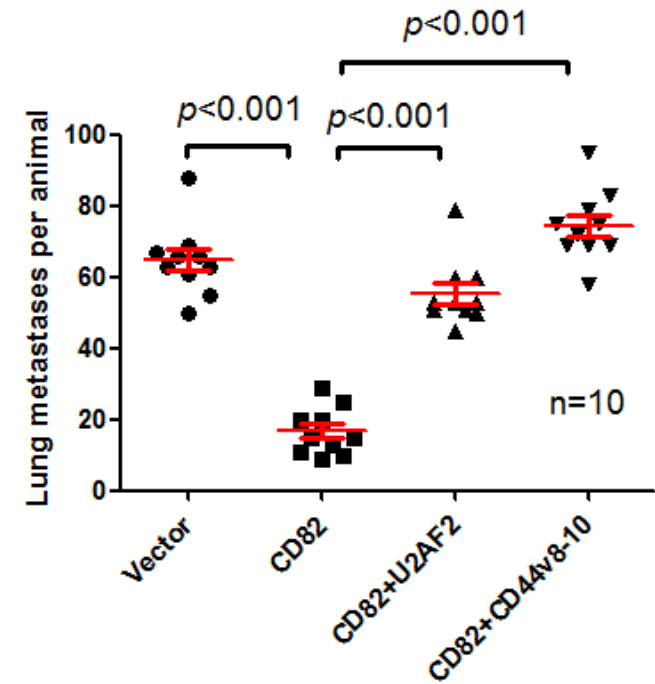

Supplement: NIHMS757208-supplement-2.pdf [file NIHMS757208-supplement-2.pdf]
